# Supplementary material
Source: PubMed Central journal article supplement (PMC4833527)
Supplement: NIHMS768319-supplement.pdf [file NIHMS768319-supplement.pdf]

## **Supplemental Information**

### **Adipose natural killer cells regulate adipose tissue macrophages to promote insulin resistance in obesity**

Byung-Cheol Lee, Myung-*Sunny* Kim, Munkyong Pae, Yasuhiko Yamamoto, Delphine Eberlé, Takeshi Shimada, Nozomu Kamei, Hee-Sook Park, Souphatta Sasorith, Ju Rang Woo, Jia You, William Mosher, Hugh J. M. Brady, Steven E. Shoelson, and Jongsoon Lee

**Figure S1 (Related to Figure 1). HFD increases organ weights and the numbers of epididymal fat immune cells.**

**A**

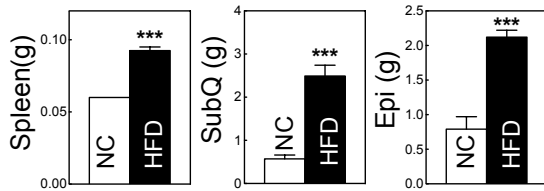

**B: Blood**

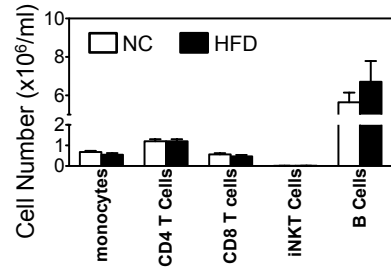

**C: Spleen**

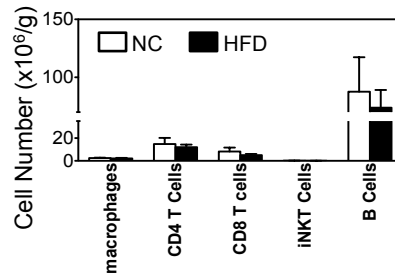

**D: SubQ Fat**

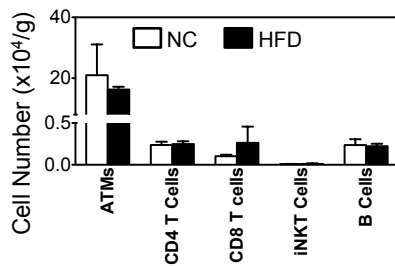

**E: Epididymal Fat**

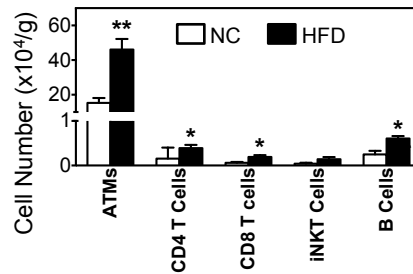

**F: Sorted ATMs**

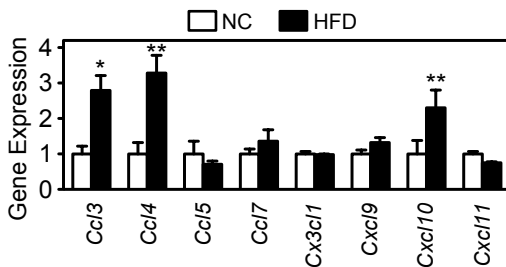

**G: Epididymal Fat**

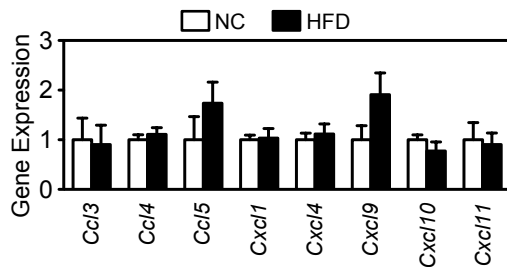

**H: Sorted ATMs**

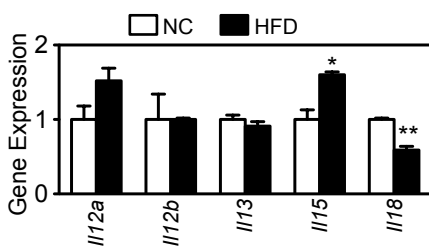

**I: Epididymal Fat**

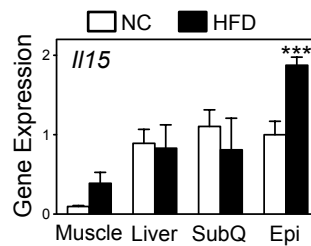

**Figure S2 (Related to Figure 2). Tissue lymphocyte numbers and weights after anti-asialo GM1 antibody-mediated NK cell depletion and recovery of NK cells.**

**A: Blood**

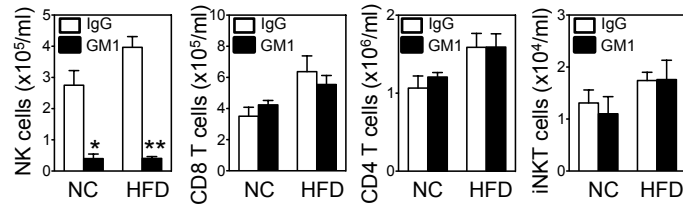

**B: Spleen**

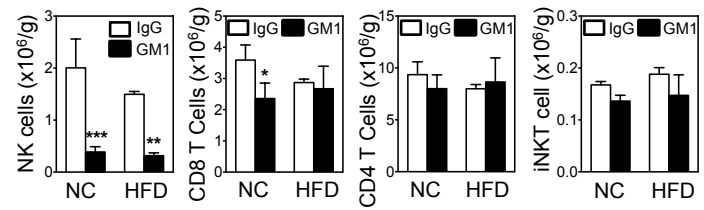

**C: Epi fat**

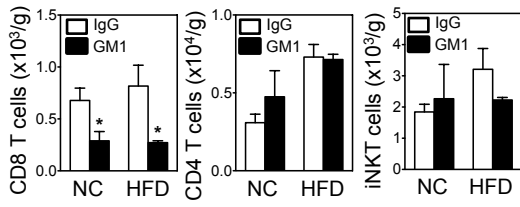

**D: Tissue Weights**

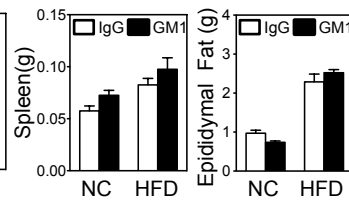

**E**

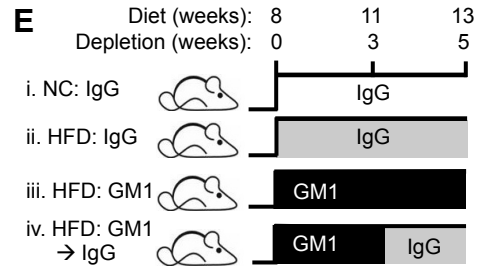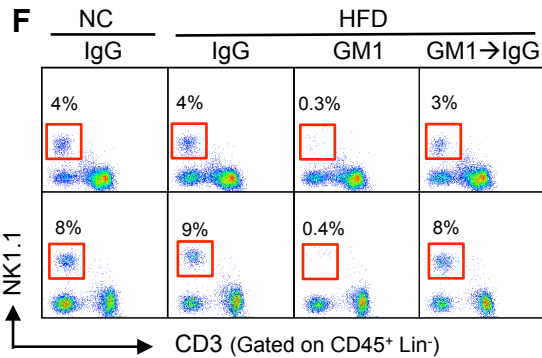

**G: Blood**

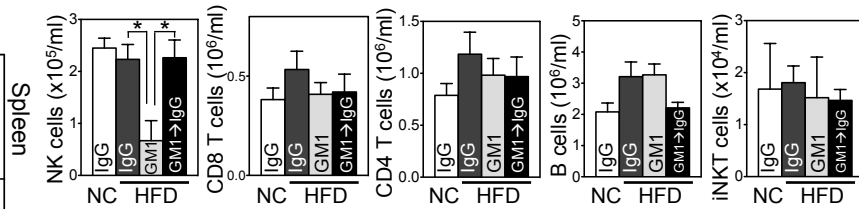

**H: Spleen**

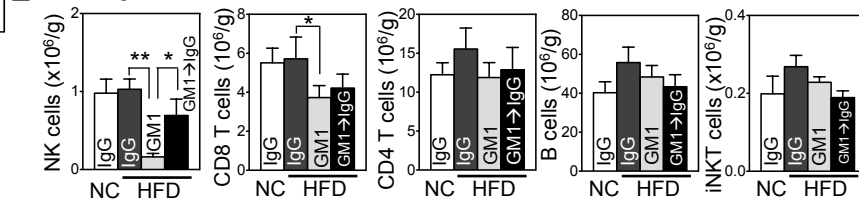

**I: Epi Fat**

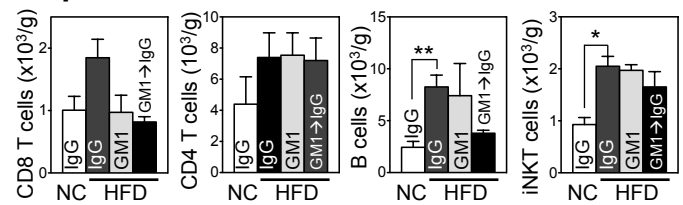

**J: Tissue Weights**

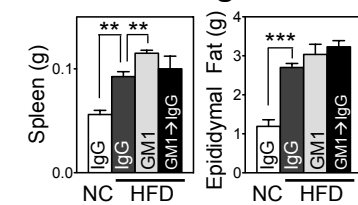

**K**

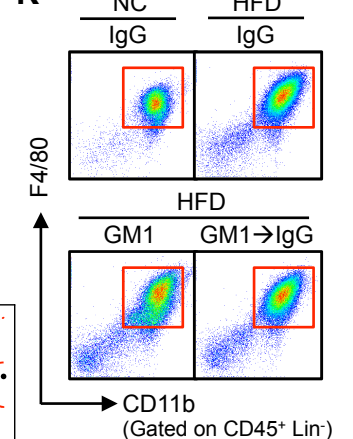

**L**

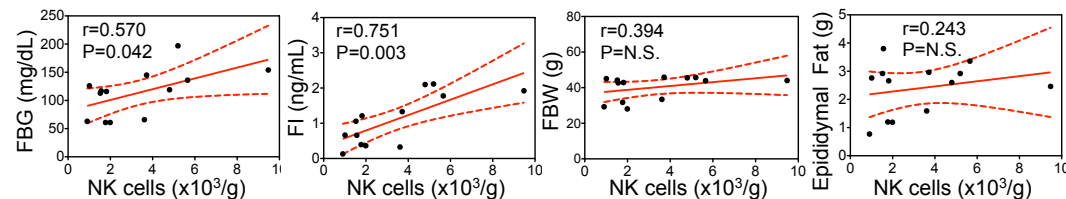

**Figure S3 (Related to Figure 3). Tissue immune cell numbers and weights after anti-NK1.1 antibody-mediated NK cell depletion.**

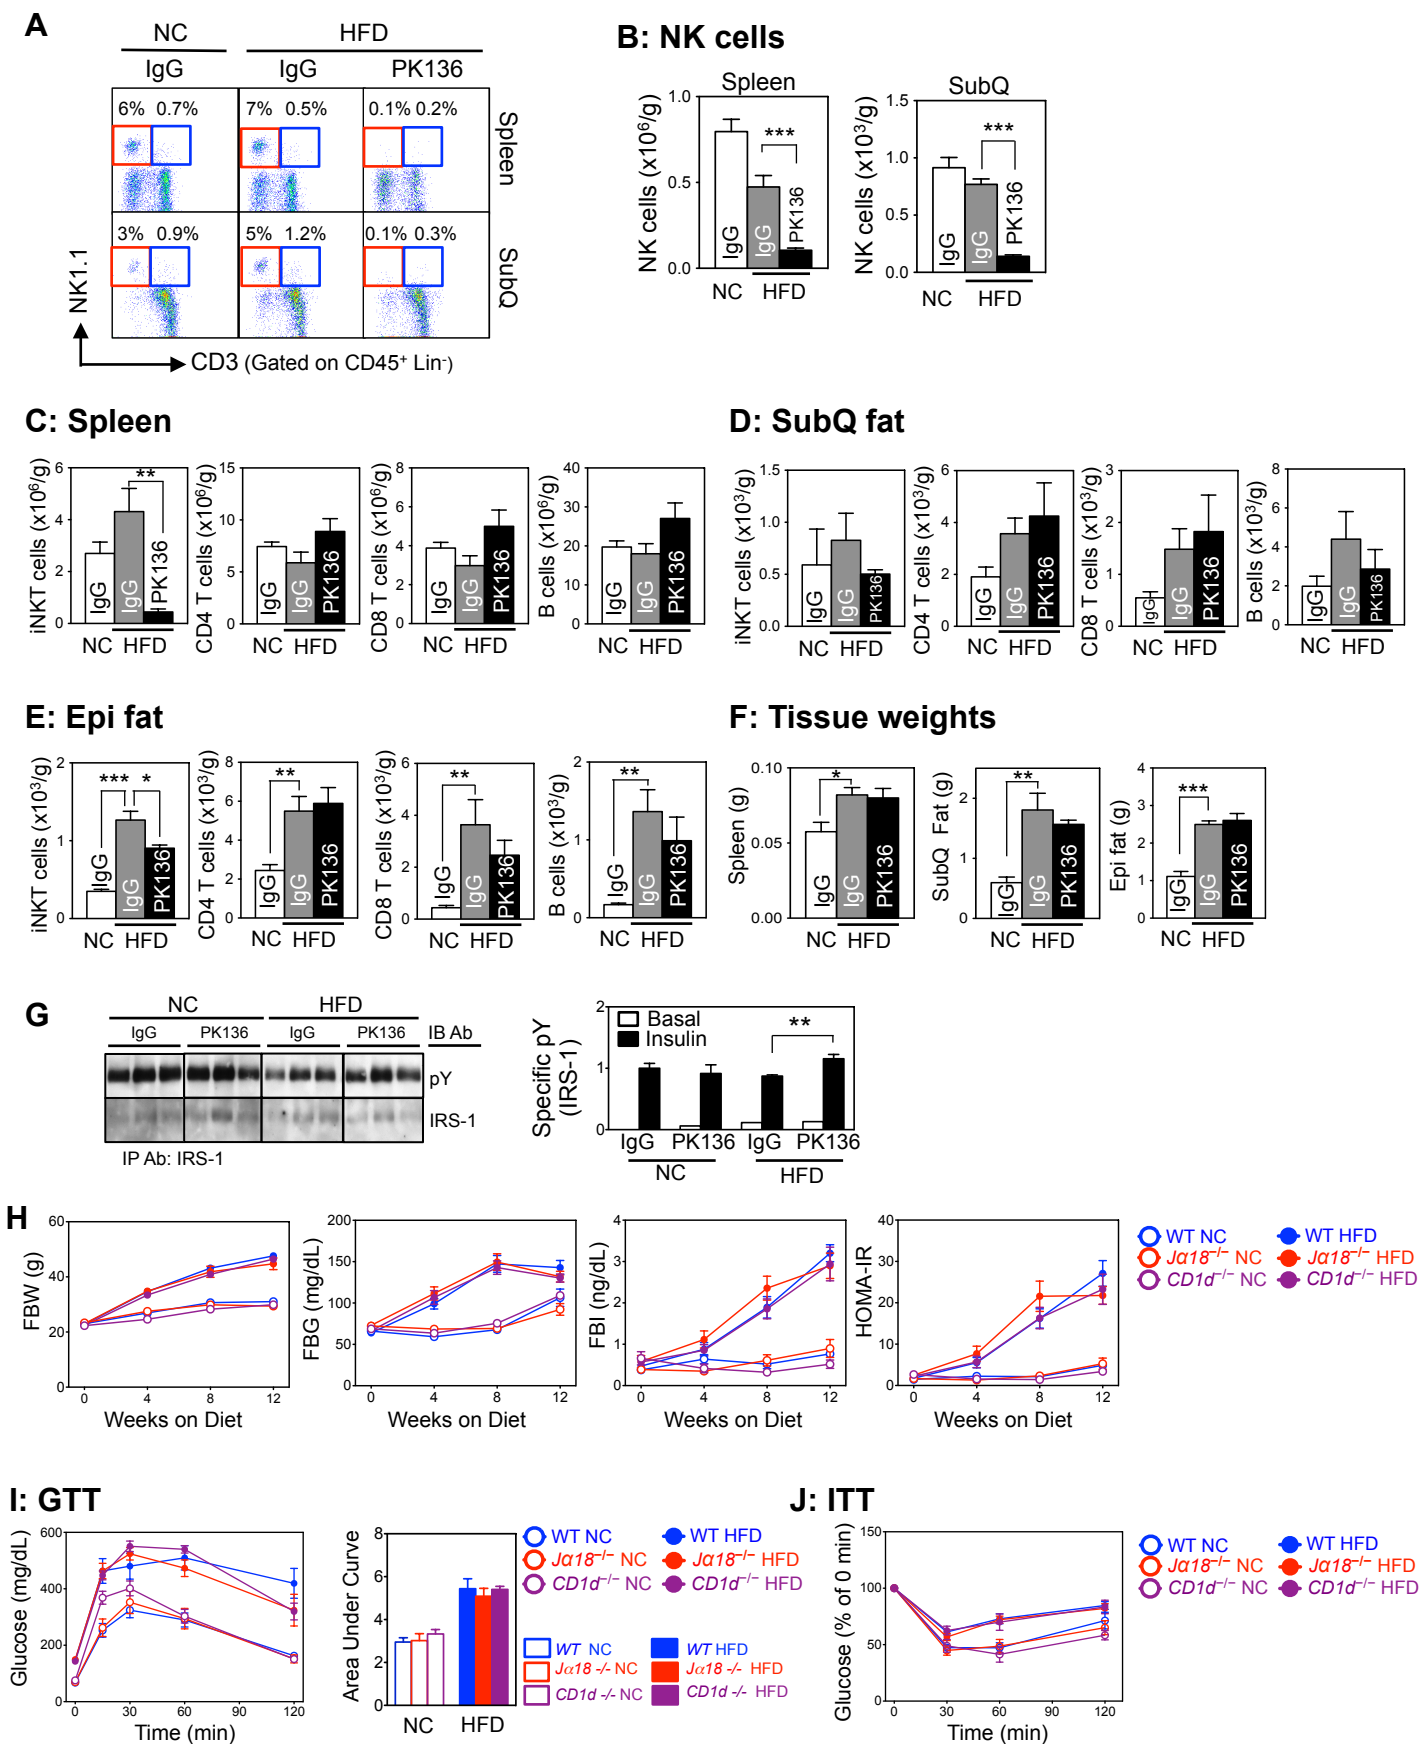

**Figure S4 (Related to Figure 4). Tissue lymphocyte numbers and weights after IL-15-mediated NK cell expansion.**

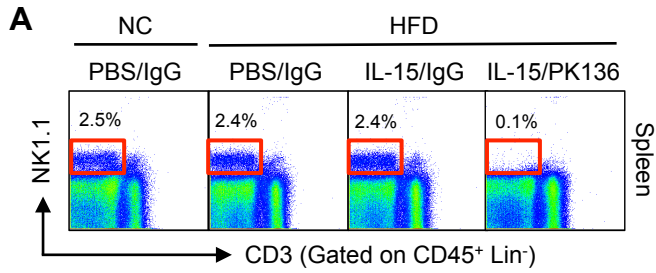

**B: Blood**

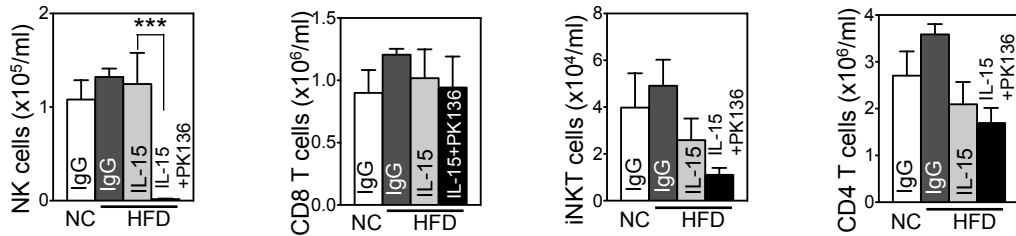

**C: Spleen**

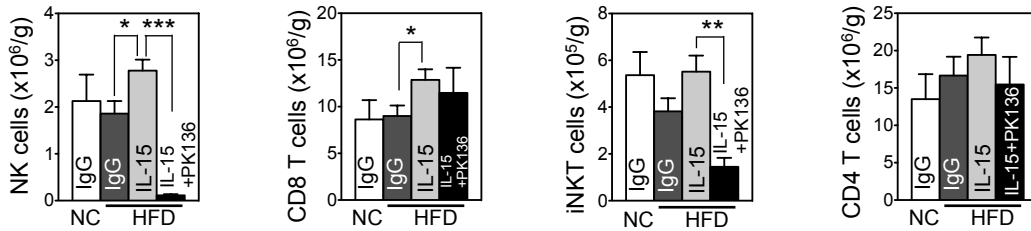

**D: Epi fat**

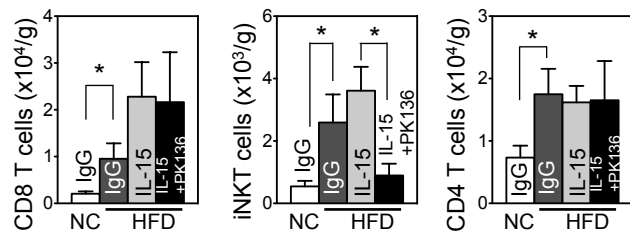

**E: Tissue weights**

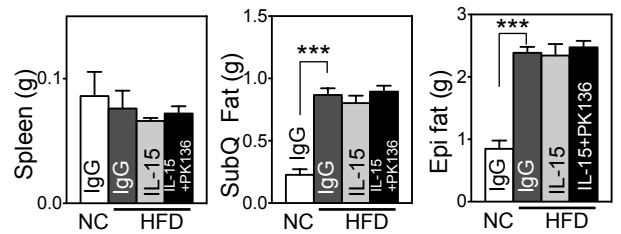

**Figure S5 (Related to Figure 5). Genetic ablation of NK cells in *E4bp4* knockout mice associates with improved HFD-induced insulin resistance.**

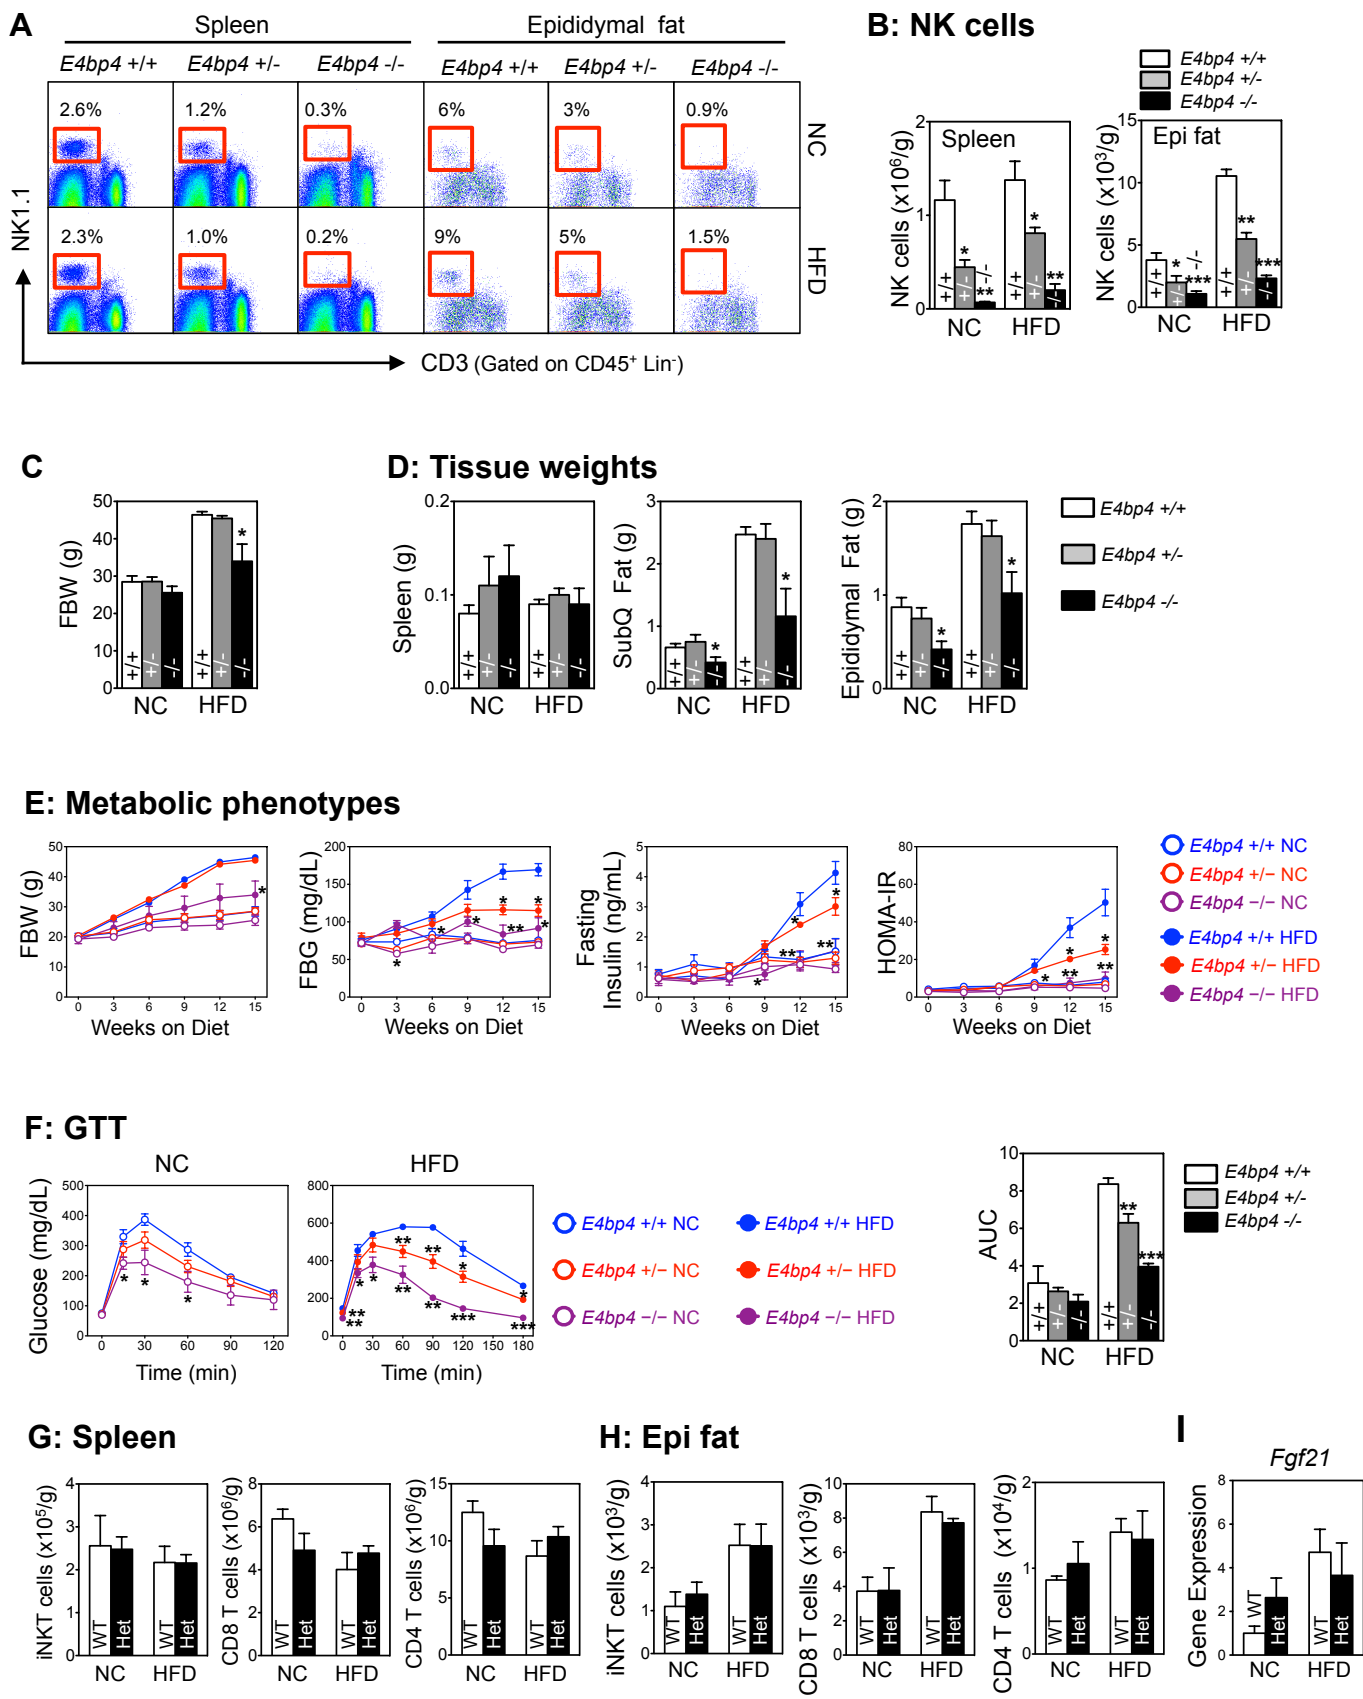

**Figure S6 (Related to Figure 6). Tissue lymphocyte numbers and weights in NK cell-reconstituted HFD-fed *E4bp4*<sup>-/-</sup> homozygous knockout mice.**

**A: NK cells**

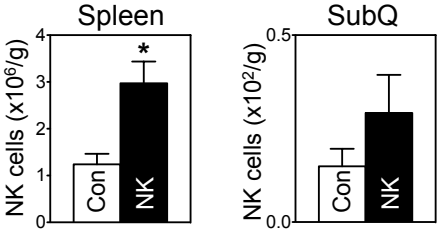

**B: Spleen**

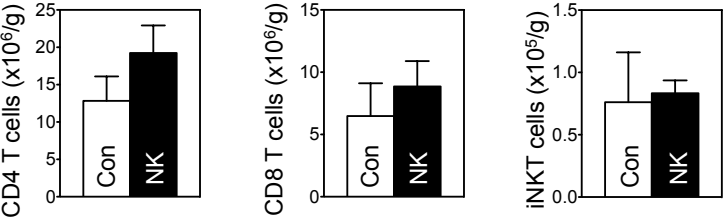

**C: SubQ fat**

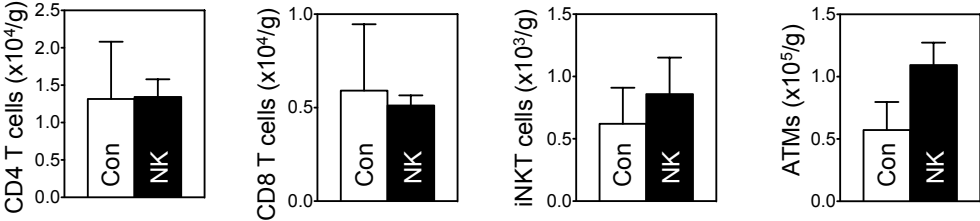

**D: Epi fat**

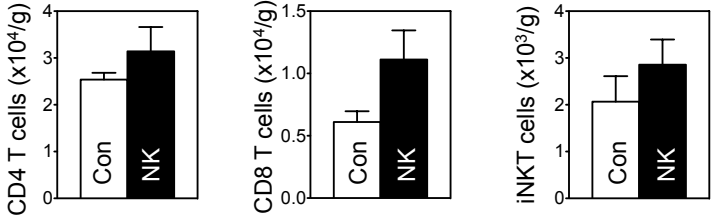

**E: Tissue weights**

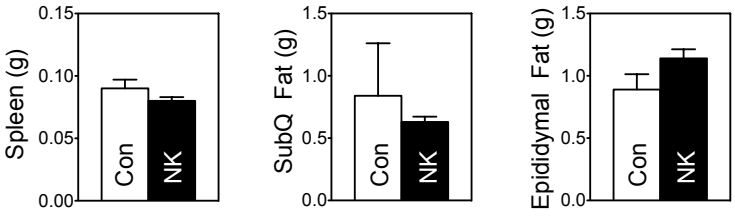

**F**

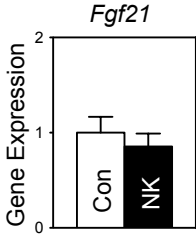

## Supplemental Information

All experiments were repeated at least twice except for the depletion/recovery experiment with anti-asialo GM1 antibody (Figure 2G-P and S2E-J) and the *in vivo* insulin signaling experiment (Figure 3I, 3J, and S3G). Those experiments were performed only once. The data are presented as mean  $\pm$  S.E.M. P-values  $<0.05$  were considered to indicate statistical significance.

### Supplemental Figure Legends

#### **Figure S1 (Related to Figure 1). HFD increases organ weights and the numbers of epididymal fat immune cells.**

Starting at 7 weeks of age, C57BL/6 male mice were given a HFD or NC for 12 weeks ( $n=5-7$ /group). (A) Tissue weights after overnight fasting. (B–E) Numbers of specific immune cells in the blood (B), spleen (C), and subcutaneous (SubQ) (D) and epididymal (E) fat stromal vascular cells (SVCs), as measured by flow cytometry and normalized by blood volume or tissue weights. NK cell chemokine gene expression levels in sorted ATMs (F) and epididymal fat (G). Expression of genes that are important for NK cell proliferation and activation in sorted ATMs (H) and epididymal fat (I). Gene expression was determined by real-time RT-PCR. The data are presented as mean  $\pm$  S.E.M. For all figures: \* $p<0.05$ , \*\* $p<0.01$ , and \*\*\* $p<0.001$ .

#### **Figure S2 (Related to Figure 2). Tissue lymphocyte numbers and weights after anti-asialo GM1 antibody-mediated NK cell depletion and recovery of NK cells.**

(A–D) C57/B6 mice fed NC or HFD for 8 weeks were injected with anti-asialo GM1 or isotype-control (IgG) antibodies for another 4 weeks while continuing their diet ( $n=4-5$ /group). After overnight fasting, tissue immune cell numbers and tissue weights were measured. (A–C) Immune cell numbers in the blood (A), spleen (B), and epididymal fat SVCs (C), as measured by flow cytometry and normalized by blood volume or tissue weights. (D) Tissue weights. (E–J) C57/B6 mice fed NC or a HFD for 10 weeks were injected with GM1 or control (IgG) antibodies for another 3 weeks while continuing their diet. The GM1-injected HFD-fed mice were then divided into two groups: one group continued to be injected with GM1 while the other group was switched from GM1 to the control antibody (IgG) to allow the NK cell population to recover from the GM1-mediated NK cell depletion (GM1 $\rightarrow$ IgG). After 2 weeks of NK cell recovery, tissue lymphocyte numbers and tissue weights were measured after an overnight fast ( $n=4-5$ /group). (E) Schematic depiction of the experiment. (F) Representative flow cytometric profiles of blood and splenic NK cells (red boxes) after depletion and recovery. The lineage markers (Lin) were TER-119, Gr-1, CD19, and CD19. (G–I) Lymphocyte numbers in the blood (G), spleen (H), and epididymal SVCs (I) after NK cell depletion and recovery, as measured by flow cytometry and normalized by blood volume or tissue weights. (J) Tissue weights. (K) Representative flow cytometric plots of epididymal ATMs (red box). The lineage markers were TER-119, CD3, CD19, and NK1.1. (L) Correlation between epididymal fat NK cell numbers after depletion and after recovery, and fasting blood glucose, fasting insulin, body weight, and fat weight. The data are presented as mean  $\pm$  S.E.M. For all figures: \* $p<0.05$ , \*\* $p<0.01$ , and \*\*\* $p<0.001$ .

#### **Figure S3 (Related to Figure 3). Tissue immune cell numbers and weights after anti-NK1.1 antibody-mediated NK cell depletion.**

(A–F) C57/B6 mice fed a HFD or NC for 8 weeks were injected with PK-136 antibody for another 4 weeks while continuing their diet. After overnight fasting, their immunological and metabolic phenotypes were measured ( $n=4-5$ /group). (A) Representative flow cytometric profiles of the NK cells in the spleen and subcutaneous fat SVCs after NK cell depletion. Red boxes, the NK cell population; blue boxes, the iNKT cell population. The lineage markers (Lin) were TER-119, Gr-1, CD19, and F4/80. (B) NK cell numbers in the spleen and subcutaneous fat SVCs (SubQ), as measured by flow cytometry and normalized by tissue weights. (C–E) NKT, CD4 T, CD8 T, and B cell numbers in the spleen (C) and subcutaneous (D) and epididymal (E) fat SVCs after NK cell depletion, as measured by flow cytometry and normalized by tissue weights. (F) Tissue weights. (G) Representative Western blot of IRS-1 in muscle (left) and quantitation



(right). (H-J) The constitutive depletion of iNKT cells in *Ja18*<sup>-/-</sup> and *CD1d*<sup>-/-</sup> homozygous knockout mice does not alter insulin sensitivity under either NC or HFD conditions. Six-week-old iNKT cell-deficient homozygous knockout mice (*Ja18*<sup>-/-</sup> and *CD1d*<sup>-/-</sup>) were fed with NC or a HFD for 12 weeks. (H) After overnight fasting, the metabolic phenotypes (fasting body weights, fasting blood glucose, fasting insulin, and HOMA-IR) over time were assessed (n=8–11/group). (I) Glucose tolerance test (GTT) and the AUC after overnight fasting. (J) Insulin tolerance tests (ITT) after 6 hours of fasting. The HFD-fed *Ja18*<sup>-/-</sup> and *CD1d*<sup>-/-</sup> mice did not differ from the HFD-fed wild-type mice. Similarly, the NC-fed *Ja18*<sup>-/-</sup> and *CD1d*<sup>-/-</sup> did not differ from the NC-fed wild-type mice. The data are presented as mean ± S.E.M. For all figures: \*p<0.05, \*\*p<0.01, and \*\*\*p<0.001.

**Figure S4 (Related to Figure 4). Tissue lymphocyte numbers and weights after IL-15-mediated NK cell expansion.**

C57BL/6 mice fed a HFD for 6 weeks were injected with PBS or IL-15 for another 4 weeks to expand the NK cells. To confirm that NK cells were responsible for the observed changes in metabolic phenotypes, the IL-15-injected HFD-fed mice were co-injected with PK-136 or the control antibody (IL-15/PK-136 and IL-15/IgG, respectively). Mice fed NC served as a control (n=5–7/group). (A) Representative flow cytometric profiles of the splenic NK cells (red boxes) after NK cell expansion with and without concomitant depletion. The lineage markers (Lin) were TER-119, Gr-1, CD19, and F4/80. (B-D) Numbers of lymphocytes in the blood (B), spleen (C), and epididymal fat SVCs (D) after NK cell expansion with and without concomitant depletion, as measured by flow cytometry and normalized by blood volume or tissue weights. (E) Tissue weights. The data are presented as mean ± S.E.M. For all figures: \*p<0.05, \*\*p<0.01, and \*\*\*p<0.001.

**Figure S5 (Related to Figure 5). Genetic ablation of NK cells in *E4bp4* knockout mice associates with improved HFD-induced insulin resistance.**

(A–F) *E4bp4*<sup>-/-</sup> homozygous knockout mice, *E4bp4*<sup>+/-</sup> heterozygous knockout mice, and littermate control *E4bp4*<sup>+/+</sup> wild-type mice (WT) were fed NC or a HFD for 15 weeks. (A) Representative flow cytometric profiles of the splenic and epididymal NK cell populations (red boxes) at 15 weeks. The lineage markers (Lin) were TER-119, Gr-1, CD19, and F4/80. (B) Splenic and epididymal adipose NK cell numbers at 15 weeks, as measured by flow cytometry and normalized by tissue weights. (C and D) Fasting body weights (C) and tissue weights (D) at 15 weeks. (E) Fasting body weights, fasting blood glucose, fasting insulin, and HOMA-IR were measured every 3 weeks. (F) glucose tolerance test (GTT) and the AUC of homozygous, heterozygous, and wild-type control mice fed NC or a HFD for 13 weeks. (G and H) T-cell subpopulation numbers in the spleen and epididymal fat from NC- and HFD-fed *E4bp4*<sup>+/-</sup> heterozygous knockout mice. The splenocytes (G) and epididymal adipose SVCs (H) from the *E4bp4*<sup>+/-</sup> heterozygous mice and littermate control *E4bp4*<sup>+/+</sup> wild-type mice (WT). (I) Expression levels of *Fgf21* mRNA in the liver, as determined by qRT-PCR. The data are presented as mean ± S.E.M. For all figures: \*p<0.05, \*\*p<0.01, and \*\*\*p<0.001.

**Figure S6. (Related to Figure 6) Tissue lymphocyte numbers and weights in NK cell-reconstituted HFD-fed *E4bp4*<sup>-/-</sup> homozygous knockout mice.**

*E4bp4*<sup>-/-</sup> homozygous knockout mice fed a HFD for 8 weeks were reconstituted with NK cells isolated from the spleen of WT mice fed a HFD for 8 weeks. PBS was injected as a control (n=4–5/group). (A) NK cell numbers in the spleen and subcutaneous fat SVCs (SubQ) after reconstitution, as measured by flow cytometry and normalized by tissue weights. (B-D) Lymphocyte numbers in the spleen (B) and subcutaneous (C) and epididymal (D) fat SVCs after reconstitution, as measured by flow cytometry and normalized by tissue weights. (E) Tissue weights. (F) Expression levels of *Fgf21* mRNA in liver, as determined by qRT-PCR. The data are presented as mean ± S.E.M. For all figures: \*p<0.05, \*\*p<0.01, and \*\*\*p<0.001.

**Table S1 (Related to Figure 1-6). Cell-surface markers for murine immune cells**

| Cell types  | Markers                   |                                                |
|-------------|---------------------------|------------------------------------------------|
|             | Positive selection        | Negative selection                             |
| NK Cells    | CD45 NK1.1+               | Gr-1, F4/80, CD3, CD19, TER 119                |
| iNKT Cells  | CD45, CD3, NK1.1          | Gr-1, F4/80, CD19, TER 119                     |
| B Cells     | CD45, CD19                | Gr-1, CD3, NK1.1, TER 119                      |
| CD4 T Cells | CD45, CD3, CD4            | Gr-1, CD8, CD19, NK1.1, TER 119                |
| CD8 T Cells | CD45, CD3, CD8            | Gr-1, CD4, CD19, NK1.1, TER 119                |
| Monocytes   | CD45, CD11b               | Ly6G <sup>hi</sup> , CD3, CD19, NK1.1, TER 119 |
| ATMs        | CD45, CD11b, F4/80        | TER-119, CD3, CD19, NK1.1                      |
| CD11c+ ATMs | CD45, CD11b, F4/80, CD11c | TER-119, CD3, CD19, NK1.1                      |

**Table S2 (Related to Figure 1-6). Cell-surface antibodies for flow cytometric analyses of mouse immune cells**

| Cell markers | Clone number | Fluorophore           | Manufacturer                                                                         |
|--------------|--------------|-----------------------|--------------------------------------------------------------------------------------|
| NK1.1        | PK-136       | PerCP Cy5.5<br>PE-Cy7 | eBioscience 45-5941-82<br>BD Pharmingen 550627                                       |
| CD49b        | DX5          | APC                   | BioLegend 550627                                                                     |
| CD3          | 145-2C11     | PE                    | eBioscience 17-5971-82<br>BioLegend 108908                                           |
| CD19         | 1D3          | PerCP Cy5.5<br>PB     | BD Pharmingen 551163<br>BioLegend 100214                                             |
| TER119       | TER-119      | PerCP Cy5.5<br>APC    | BioLegend 115534<br>BioLegend 115512<br>BioLegend 115508                             |
| CD45         | 30-F11       | APC-Cy7               | eBioscience 17-5921-83<br>BioLegend 116228                                           |
| CD11c        | N418         | PE<br>PB              | BD Pharmingen 557659<br>BioLegend 103116                                             |
| F4/80        | BM8          | PE-Cy7                | eBioscience 2-0114-83<br>BioLegend 117322                                            |
| CD11b        | M1/70.15     | PerCP Cy5.5<br>PETR   | eBioscience 25-4801-82<br>BioLegend 123114<br>BD Pharmingen 550993                   |
| Gr1          | RB6-8C5      | PB                    | Invitrogen RM2817                                                                    |
| CD4          | RM4-5        | APC<br>PETR<br>PB     | eBioscience 57-5931-82<br>BioLegend 108412<br>Caltag Lab MCD0417<br>BioLegend 100531 |
| CD8          | 53-6.7       | PerCPCy5.5<br>PE Cy7  | BD Pharmingen 551162,<br>BioLegend 100722                                            |
| CD25         | 3C7          | FITC                  | BD Pharmingen 558689                                                                 |
| IgG          | R3-34        | PE                    | BioLegend 400608                                                                     |
| IFN $\gamma$ | XMG1.2       | PE                    | BioLegend 505808                                                                     |
| TNF $\alpha$ | MP6-XT22     | PE                    | BioLegend 506306                                                                     |
| IL-10        | JES5-16E3    | PE                    | BioLegend 505008                                                                     |
| IL-6         | MP5-20F3     | PE                    | BioLegend 504504                                                                     |
